# Supplementary material for: A facile approach to fabricate functional 3D macroscopic silica microtube networks using N,N′-methylenediacrylamide organogel as template
Source: Royal Society of Chemistry journal article supplement (doi:10.1039/b811412a), 2008-01-01
Supplement: b811412a.pdf [file b811412a.pdf]

*Supporting Information for*

## **A facile approach to functional 3D macroscopic silica micro-tube network using N,N'-methylenediacrylamide organogel as a template**

*Yu Xia, Yu Wang, Kai Chen, Liming Tang\**

Laboratory of Advanced Materials, Department of Chemical Engineering,

Tsinghua University, Beijing 100084, P. R. China

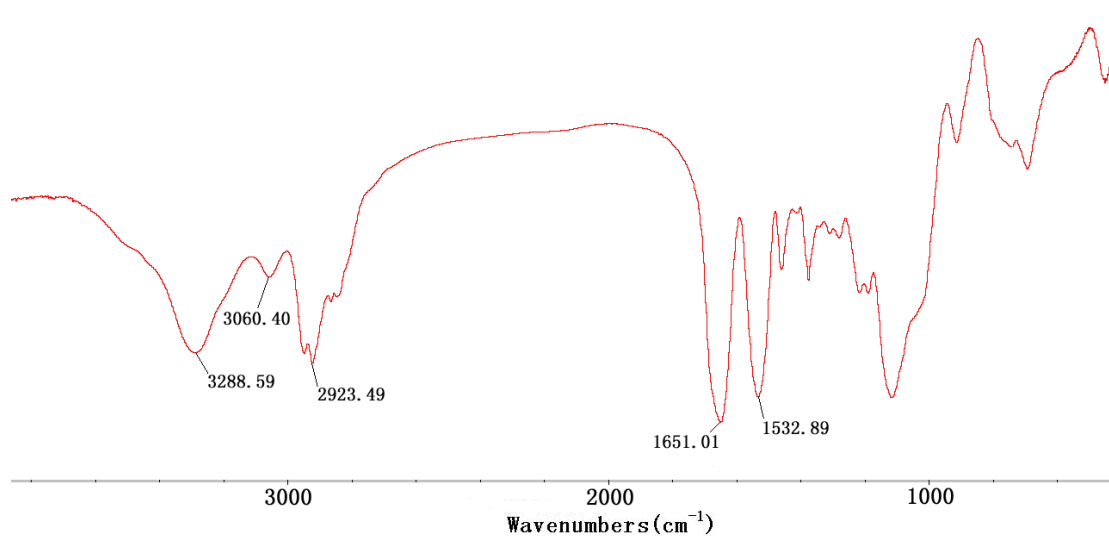

**Fig 1. IR Spectrum of MTN.**

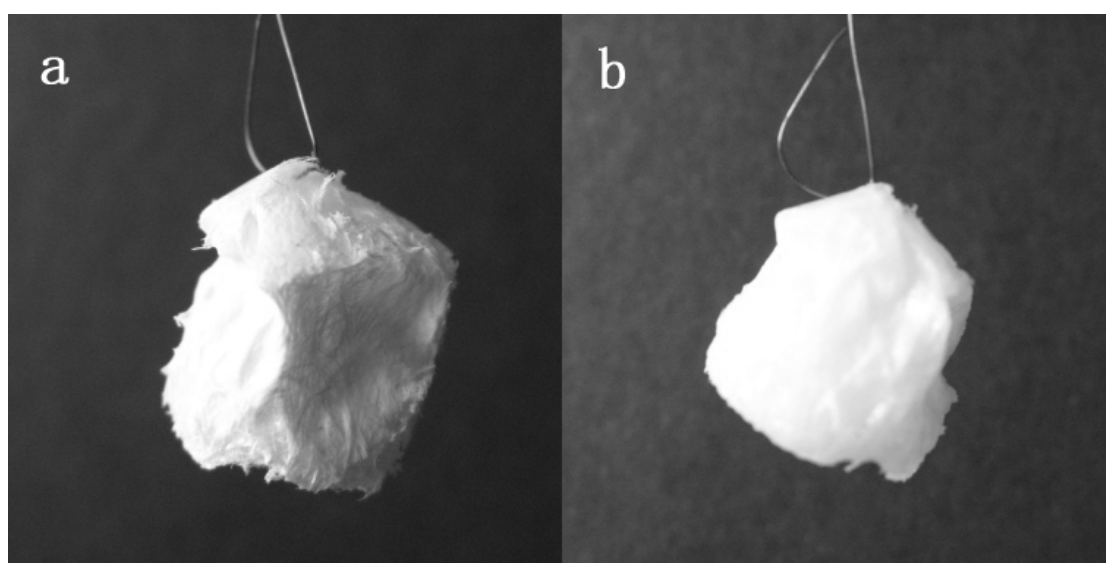

**Fig 2. The macroscopic morphologies of MTN: (a) dried sample; (b) the sample saturated by chloroform (chloroform/MTN  $\approx$  15, wt%)**
